# Supplementary material for: Pollutants corrupt resilience pathways of aging in the nematode C. elegans
Source: bioRxiv or medRxiv preprint supplement (doi:10.1101/2021.09.28.461818), 2021-09-29
Supplement: Supplementary file [file media-1.pdf]

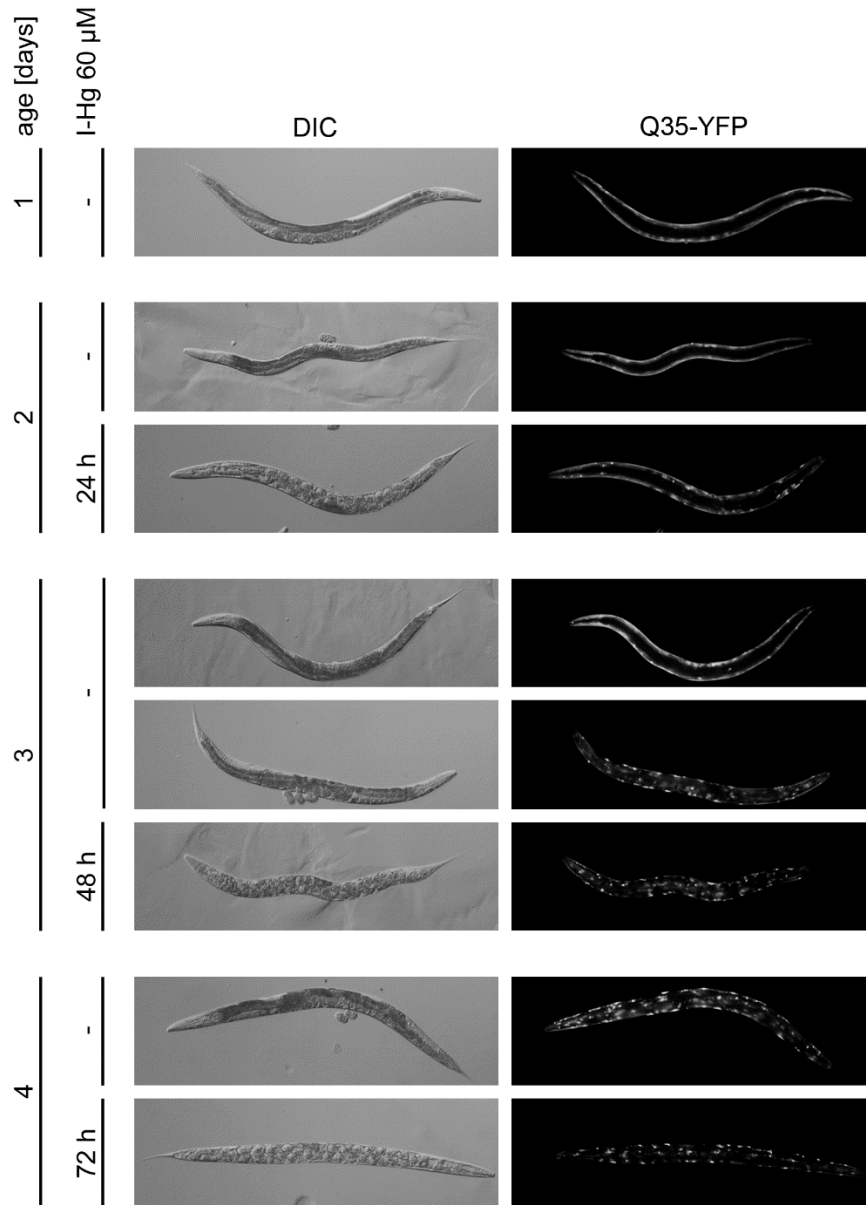

**Figure S1. iHg accelerates proteotoxic stress.** Representative fluorescent micrographs of 1, 2, 3, and 4 day old, adult hermaphrodites of a *C. elegans* proteotoxic stress model that expresses homopolymeric repeats of 35 glutamines fused to yellow fluorescent protein (Q35::YFP) in body wall muscle cells (Morley et al., 2002). Hermaphrodites were mock-treated or exposed to 50  $\mu$ M iHg for 24, 48, and 72 hours. Bar, 100  $\mu$ M. Mock-treated showed an age-related change from a mostly smooth distribution of yellow fluorescence along the body wall muscles to a dotted pattern of aggregated polyQ. Hermaphrodites exposed to iHg exhibit an acceleration of the age-related change to aggregated polyQ with a first appearance at adult day 2. Note that the two depicted

untreated hermaphrodites for the 48-hour time-point reflect the wide range of aggregation progression observed in this cohort.

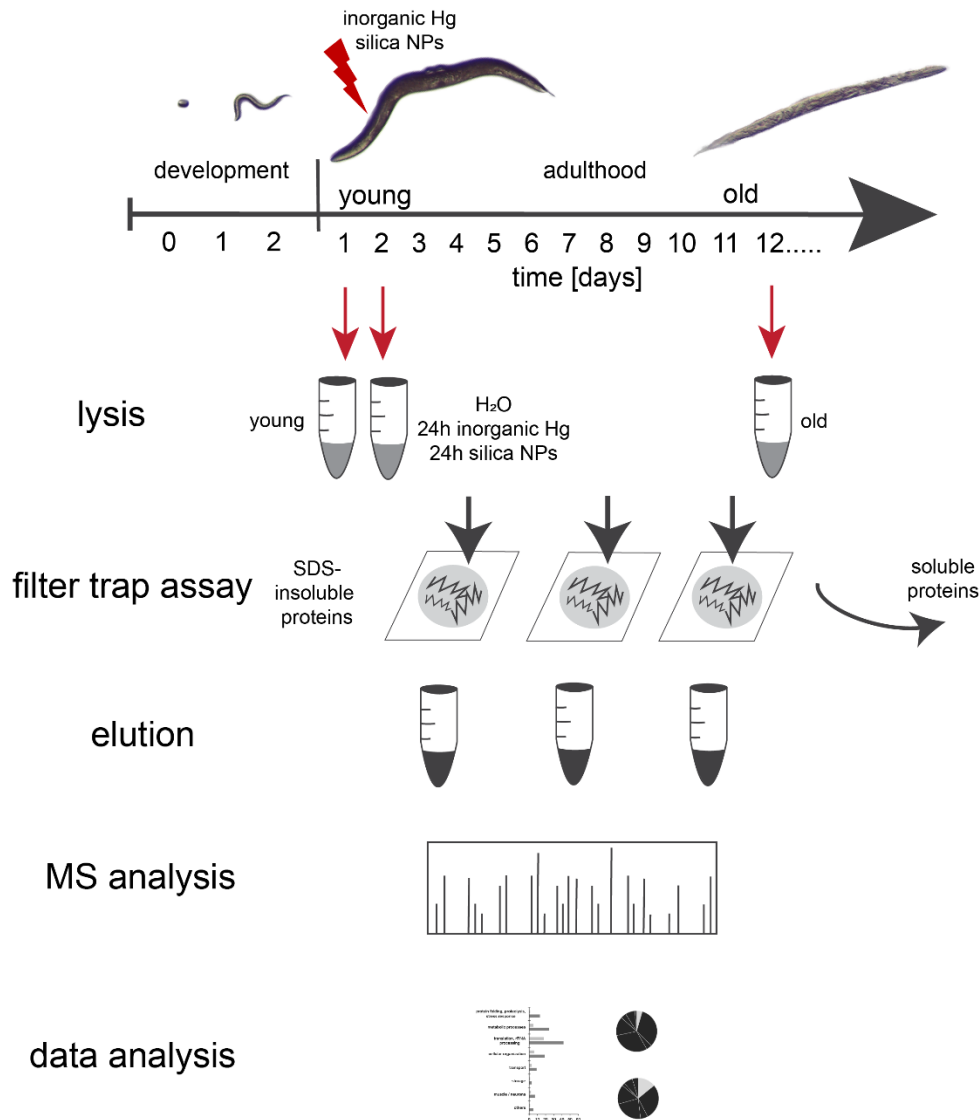

**Figure S2. Schematic of the experimental design of the different aggregate characterizations.** For the iHg- and silica NPs- induced aggregate analysis, synchronized wild type *C. elegans* (N2) were mock-treated, or exposed to iHg or silica NPs on adult day 1 for 24 hours before lysis. For the age-induced aggregate analysis, synchronized wild type *C. elegans* (N2) were lysed on adult day 1 as “young” or on adult day 12 as “old”. SDS-insoluble proteins were trapped on filter, eluted with 6M guanidinium hydrochloride, followed by mass spectrometry (ESI-LC/MS), and data analysis including data mining. Note that the experiments to identify the iHg, the silica NPs, and the age-induced aggregate networks were done separately.

GO-group: protein folding, proteolysis, stress response

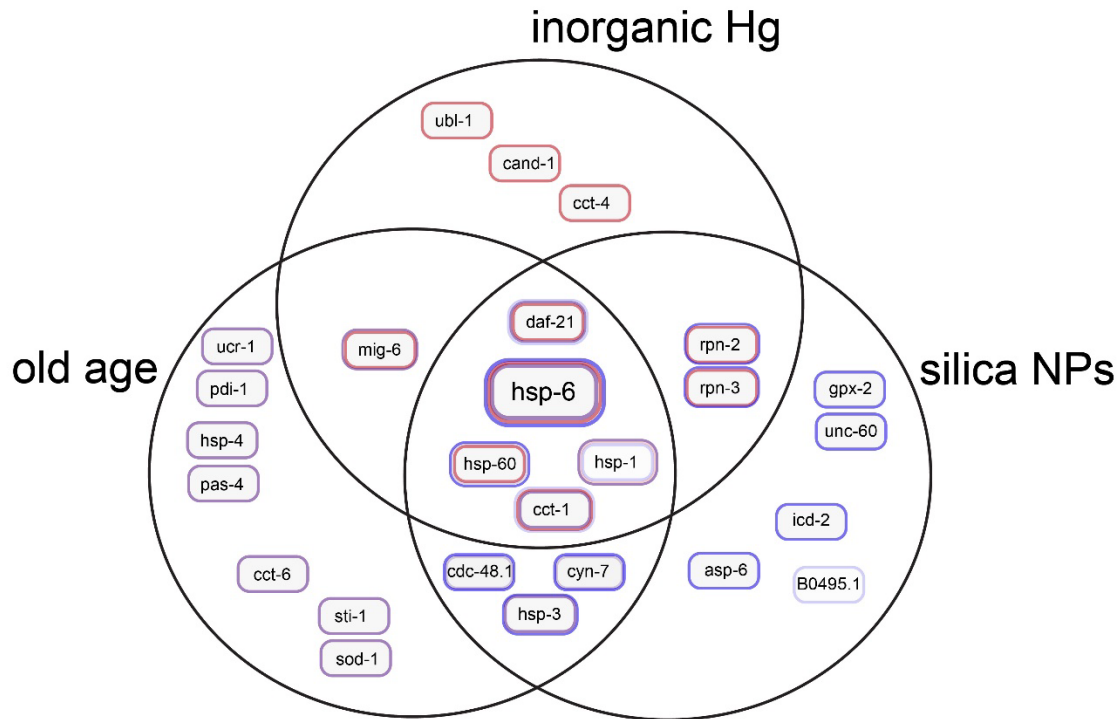

**Figure S3. GO-group: protein folding, proteolysis, and stress response.** Venn diagram of identified insoluble proteins categorized according their biological process protein folding, proteolysis, and stress response classified by the PANTHER databank (Mi et al., 2013) in the iHg- (red), silica NPs- (blue, (Scharf et al., 2016)), and age-induced (purple) aggregate network. The boxes indicate the number of proteins identified in the ground and specific aggregate, respectively.



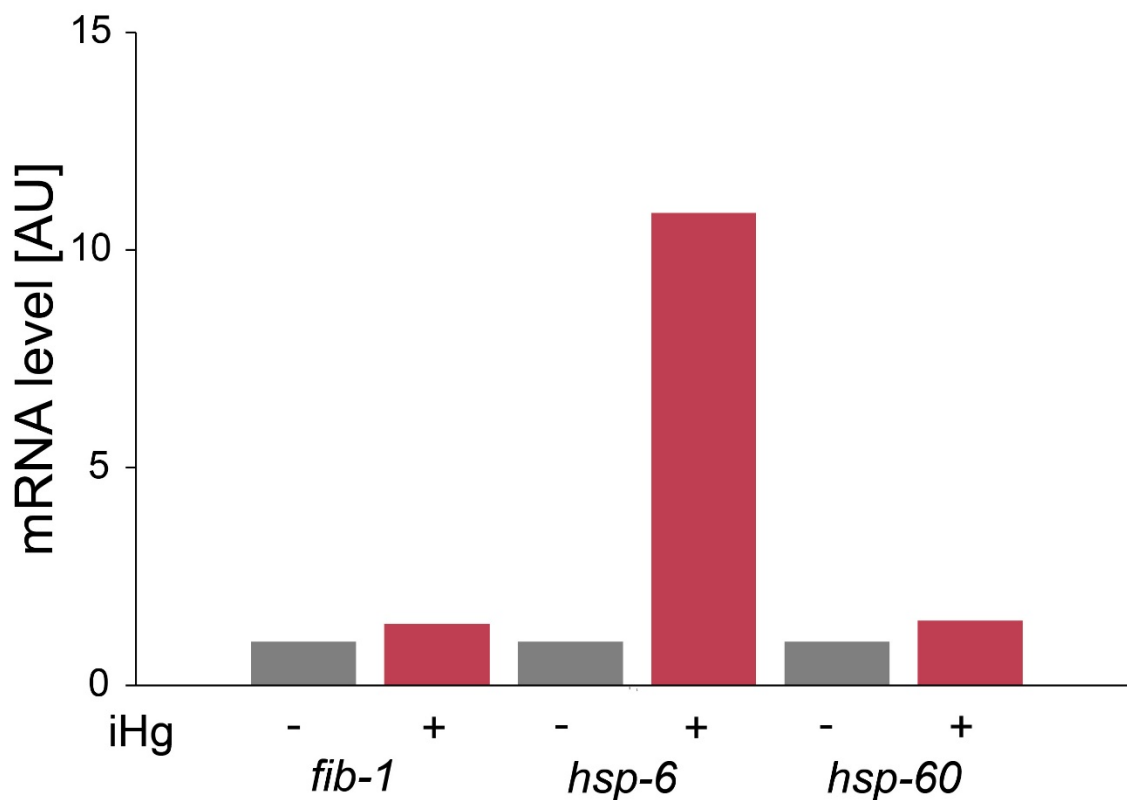

**Figure S5. Expression is not correlated with protein aggregation.** The bar graph shows mRNA levels of *fib-1*, *hsp-6*, and *hsp-60* in H<sub>2</sub>O-treated versus 50  $\mu$ M iHg-treated wild type *C. elegans*. RNA levels were determined by qPCR in two independent experiments and show fold change compared to H<sub>2</sub>O control.
