# Supplementary material for: Pollutants corrupt resilience pathways of aging in the nematode C. elegans
Source: bioRxiv or medRxiv preprint supplement (doi:10.1101/2021.09.28.461818), 2021-09-29
Supplement: Supplementary file [file media-2.pdf]

**Supplementary Table 1.** Lifespan summary statistics. Related to Figure 1.

| Strain | Treatment <sup>1</sup>  | Mean adult lifespan +/- SD (days) <sup>2</sup> | Maximum adult lifespan (days) <sup>3</sup> | N <sup>4</sup> (n <sup>5</sup> ) |
|--------|-------------------------|------------------------------------------------|--------------------------------------------|----------------------------------|
| N2     | HgCl <sub>2</sub> 0 μM  | 22                                             | 32                                         | 2(144)                           |
| N2     | HgCl <sub>2</sub> 10 μM | 19                                             | 27                                         | 2(167)                           |
| N2     | HgCl <sub>2</sub> 25 μM | 8                                              | 12                                         | 2(171)                           |
| N2     | HgCl <sub>2</sub> 50 μM | 3                                              | 7                                          | 2(168)                           |
| N2     | silica NPs 0 mg/ml      | 23 +/-2                                        | 37 +/-3                                    | 3(406)                           |
| N2     | silica NPs 0.02 mg/ml   | 23 +/-2                                        | 37 +/-2                                    | 3(395)                           |
| N2     | silica NPs 1.25 mg/ml   | 15 +/-3                                        | 28 +/-3                                    | 3(454)                           |
| Daf-2  | silica NPs 0 mg/ml      | 31 +/-2                                        | 51 +/-4                                    | 3(344)                           |
| Daf-2  | silica NPs 0.02 mg/ml   | 31 +/-3                                        | 50 +/-4                                    | 3(344)                           |
| Daf-2  | silica NPs 1.25 mg/ml   | 26 +/-2                                        | 40 +/-3                                    | 3(320)                           |
| Daf-16 | silica NPs 0 mg/ml      | 16 +/-4                                        | 31 +/-1                                    | 3(426)                           |
| Daf-16 | silica NPs 0.02 mg/ml   | 12 +/-4                                        | 29 +/-2                                    | 3(414)                           |
| Daf-16 | silica NPs 1.25 mg/ml   | 16 +/-5                                        | 21 +/-4                                    | 3(416)                           |

Values are mean with standard deviation (SD).

<sup>1</sup>treatment:

<sup>2</sup>mean adult lifespan: average adult lifespan.

<sup>3</sup>maximum adult lifespan: lifespan of the longest lived worm.

<sup>4</sup>N: Number of independent laboratory experiments or simulations.

<sup>5</sup>n: Number of worms analyzed.

**Supplementary Table S2.** Silica NPs and iHg induce protein fibrillation.

| Experimental system                  | Phenotype                   | Silica NPs                                      | iHg                                              |
|--------------------------------------|-----------------------------|-------------------------------------------------|--------------------------------------------------|
| <b>human cells<sup>1</sup></b>       | global amyloid fibrillation | ND                                              | yes (Arnhold et al., 2015)                       |
|                                      | local amyloid fibrillation  | yes, nucleus (Chen et al., 2008)                | yes: nucleus, nucleolus (Arnhold et al., 2015)   |
| <b><i>C. elegans</i><sup>2</sup></b> | global amyloid fibrillation | yes (Scharf et al., 2013, 2016)                 | yes, this study                                  |
|                                      | local amyloid fibrillation  | yes, intestinal nucleolus (Scharf et al., 2016) | yes, intestinal nucleolus (Arnhold et al., 2015) |

<sup>1</sup>human cells: human cell culture with HEp-2 or SH-SY5Y

<sup>2</sup>*C. elegans* wild type N2

ND, not determined
